# Supplementary material for: Exploring New Inflammatory Biomarkers and Pathways during LPS-Induced M1 Polarization
Source: Hindawi journal article supplement (doi:10.1155/2016/6986175), 2016-01-01
Supplement: f1 [file 6986175.f1.pdf]

**Fig. S1**

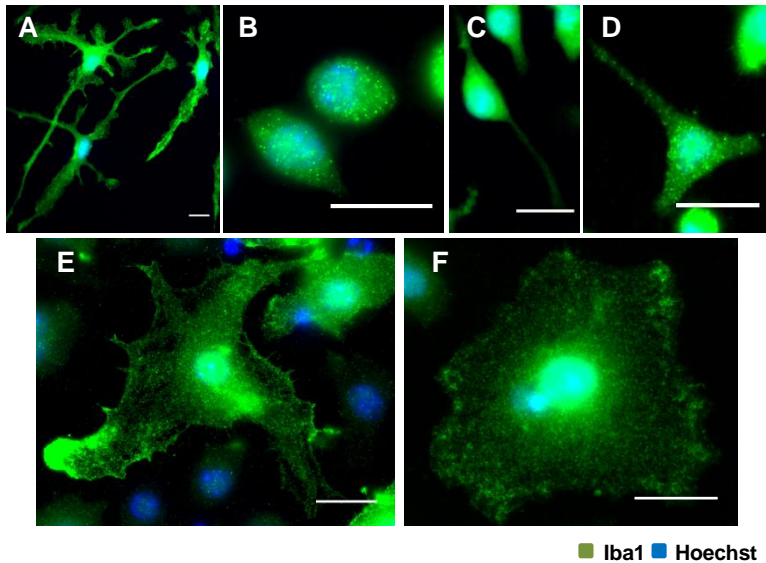

**Fig. S1. N9 microglial cells show lower number and length of ramifications than primary cultured microglia from mice cortical brain and a combination of distinct morphologies.** Morphological analysis was performed by immunocytochemistry using anti-Iba1, as indicated in methods. Nuclei were stained with Hoechst (blue fluorescence). Primary cultures of microglia isolated from mice cortical brain were stained with Iba-1 and used for comparative purpose (A). Different morphologies observed in N9 cells included round/oval (B), ramified with two (C) or three (D) ramifications, amoeboid with thicker branches (D) and amoeboid with absent ramifications (E). Representative results of one experiment are shown and scale bar represents 20  $\mu$ m.

**Table S1 – List of primers used in qRT-PCR**

| <b>Gene</b>            | <b>Forward Primer Sequence</b>  | <b>Reverse Primer Sequence</b>   |
|------------------------|---------------------------------|----------------------------------|
| <i>beta-actin</i>      | 5'-GTCCCGGCATGTGCAA-3'          | 5'-AGGATCTTCATGAGGTAGT-3'        |
| <i>Nos2</i>            | 5'-ACCCACATCTGGCAGAATGAG-3'     | 5'-AGCCATGACCTTTCGCATTAG-3'      |
| <i>Mhc-II</i>          | 5'-TGGGCACCATCTTCATCATT-3'      | 5'-GGTCACCCAGCACACCACTT-3'       |
| <i>Arg1</i>            | 5'-CTTGGCTTGCTTCGGAAGTC-3'      | 5'-GGAGAAGGCGTTTGCTTAGTTC-3'     |
| <i>Fizz1</i>           | 5'-GCCAGGTCCTGGAACCTTTC-3'      | 5'-GGAGCAGGGAGATGCAGATGAG-3'     |
| <i>Cx3cr1</i>          | 5'-TCGTCTTCACGTTCCGGTCTG-3'     | 5'-CTCAAGGCCAGGTTTCAGGAG-3'      |
| <i>Cd11b</i>           | 5'-CAGATCAACAATGTGACCGTATGGG-3' | 5'-CATCATGTCCCTTGTAAGTCCGCTTG-3' |
| <i>Nlrp3</i>           | 5'-TGCTCTTCACTGCTATC AAGCCCT-3' | 5'-ACAAGCCTTTGCTCCAGACCCTAT3'    |
| <i>Il-1beta</i>        | 5'-CAGGCTCCGAGATGAACAAC-3'      | 5'-GGTGGAGAGCTTTCAGCTCATA-3'     |
| <i>Il-18</i>           | 5'-TGGTTCCATGCTTTCTGGACTCCT-3'  | 5'-TTCCTGGGCCAAGAGGAAGTG-3'      |
| <b>miRNA</b>           | <b>Primer Sequence</b>          |                                  |
| <i>mmu-miR-155-5p</i>  | 5'-JUAAUGCUAAUUGUGAUAGGGGU-3'   |                                  |
| <i>hsa-miR-146a-5p</i> | 5'-UGAGAACUGAAUCCAUGGGUU-3'     |                                  |
| <i>hsa-miR-124-3p</i>  | 5'-UAAGGCACGCGGUGAAUGCC-3'      |                                  |

**Table S2 – List of primary antibodies used in Western Blot**

| <b>Primary antibody</b> | <b>Species</b> | <b>Reference</b>                             | <b>Dilution</b>                       |
|-------------------------|----------------|----------------------------------------------|---------------------------------------|
| <b>β-actin</b>          | mouse          | A5441, Sigma-Aldrich, St. Louis, MO, USA     | 1:5000                                |
| <b>CX3CR1</b>           | rabbit         | sc-30030, Santa Cruz Biotechnology®, CA, USA | 1:100                                 |
| <b>MFG-E8</b>           | rabbit         | sc-33546, Santa Cruz Biotechnology®, CA, USA | 1:175                                 |
| <b>TLR4</b>             | rabbit         | sc-10741, Santa Cruz Biotechnology®, CA, USA | 1:100                                 |
| <b>TLR2</b>             | rabbit         | sc-10739, Santa Cruz Biotechnology®, CA, USA | 1:100                                 |
| <b>NF-κB</b>            | rabbit         | sc-372, Santa Cruz Biotechnology®, CA, USA   | 1:500 (or 1:200 for nuclear extracts) |
| <b>HMGB1</b>            | mouse          | 651402, BioLegend, San Diego, CA, USA        | 1:200                                 |
